# Supplementary material
Source: MDPI journal article supplement (https://www.mdpi.com/2077-0472/14/1/61)
Supplement: s1 [file s1]

*Supplementary Material*

# The biocontrol of plant pathogenic fungi by selected lactic acid bacteria – from laboratory to field study

Romuald Gwiazdowski<sup>1,\*</sup>, Krzysztof Kubiak<sup>1</sup>, Krzysztof Juś<sup>2</sup>, Katarzyna Marchwińska<sup>2</sup> and Daniela Gwiazdowska<sup>2</sup>

<sup>1</sup> Research Centre for Registration of Agrochemicals, Institute of Plant Protection - National Research Institute, Władysława Węgorka 20, Poznań, 60-318, Poland; R.Gwiazdowski@iorpib.poznan.pl; K.Kubiak@iorpib.poznan.pl

<sup>2</sup> Department of Natural Science and Quality Assurance, Institute of Quality Science, Poznań University of Economics and Business, Niepodległości 10, Poznań, 61-875, Poland; krzysztof.jus@ue.poznan.pl; katarzyna.marchwinska@ue.poznan.pl; daniela.gwiazdowska@ue.poznan.pl

\* Correspondence: R.Gwiazdowski@iorpib.poznan.pl

---

## 1. Supplementary Material

**Table S1.** Indicator microorganisms used for the antifungal activity studies

| Strain identification number | Species                              | Isolation source |
|------------------------------|--------------------------------------|------------------|
| KZF 1                        | <i>Fusarium graminearum</i>          | Winter wheat     |
| KZF 5                        | <i>Fusarium culmorum</i>             | Winter wheat     |
| KZF 27                       | <i>Fusarium oxysporum</i>            | Oats             |
| KZF 181                      | <i>Fusarium poae</i>                 | Oats             |
| KZF 32                       | <i>Alternaria alternata</i>          | Winter rapeseed  |
| KZF 38                       | <i>Rhizoctonia solani</i>            | Potato           |
| BPR 1303                     | <i>Colletotrichum gleosporioides</i> | Yellow lupine    |
| KZF 53                       | <i>Sclerotinia sclerotiorum</i>      | Winter rapeseed  |

**Table S2.** Cultivation conditions and soil characteristics in the field experiments

| Characteristics of cultivation conditions |                    |                       |              |
|-------------------------------------------|--------------------|-----------------------|--------------|
| parameter                                 |                    | sowing period         |              |
|                                           |                    | 2015/2016             | 2016/2017    |
| Forecrop                                  |                    | winter barley         | winter wheat |
| Soil type                                 |                    | sandy loam            | loamy sand   |
| Soil class                                |                    | IVa                   | IVa          |
| Organic matter content [%]                |                    | 1.19                  | 0.98         |
| Soil pH                                   |                    | 5.6                   | 5.5          |
|                                           |                    | percentage share [%]  |              |
| Soil granulometric composition [mm]:      | sands 2.0 – 0.05   | 69.12                 | 74.67        |
|                                           | dusts 0.05 – 0.002 | 27.63                 | 22.74        |
|                                           | clays < 0.002      | 3.25                  | 2.59         |
| Soil cultivation                          |                    |                       |              |
| sowing period                             | date               | Type of cultivation   |              |
| 2015/2016                                 | 17.08.2015         | Disc harrow           |              |
|                                           | 07.09.2015         | Plowing               |              |
|                                           | 10.09.2015         | Cultivating aggregate |              |
|                                           | 09.10.2015         | Cultivating aggregate |              |
| 2016/2017                                 | 31.08.2016         | Disc harrow           |              |
|                                           | 13.10.2016         | Plowing               |              |
|                                           | 14.10.2016         | Cultivating aggregate |              |

**Table S3.** General information about fertilization and plant control

| Fertilization          |            |                                  |                      |                        |
|------------------------|------------|----------------------------------|----------------------|------------------------|
| sowing period          | date       | trade name of mineral fertilizer | dose [l; kg/ha]      | rate of NPK [l; kg/ha] |
| 2015/2016              | 08.09.2015 | Polifoska                        | 400                  | N-16; P-48; K-128      |
|                        | 14.03.2016 | Saletra amonowa 34%              | 176                  | N-60                   |
| 2016/2017              | 14.10.2016 | Amofoska                         | 500                  | N-20; P-60; K-100      |
|                        | 06.03.2017 | Saletra amonowa 34%              | 176                  | N-60                   |
|                        | 12.04.2017 | Saletra amonowa 34%              | 176                  | N-60                   |
| Pesticide applications |            |                                  |                      |                        |
| sowing period          | date       | type of pesticide                | trade name           | dose [l; kg/ha]        |
| 2015/2016              | 04.04.2016 | herbicide                        | Mocarz 75 WG         | 0.2                    |
|                        | 25.04.2016 | herbicide                        | Starane Super 101 SE | 1.25                   |
| 2016/2017              | 23.11.2016 | herbicide                        | Komplet 560 EC       | 0.5                    |
|                        | 25.05.2017 | insecticide                      | Fury 100 EC          | 0.1                    |

**Table S4.** Meteorological data during the field experiment in the sowing season 2015/2016.

| Location of meteorological station: Winna Góra |                           |         |       |       |              |
|------------------------------------------------|---------------------------|---------|-------|-------|--------------|
| Month/year                                     | Weather parameters        | Decades |       |       | Mean/total   |
|                                                |                           | I       | II    | III   |              |
| 9/2015                                         | average temp. [°C]        | 15,62   | 17,50 | 12,36 | <b>15,16</b> |
|                                                | average air humidity [%]  | 73,36   | 75,55 | 75,93 | <b>74,95</b> |
|                                                | total precipitations [mm] | 12,50   | 5,50  | 0,00  | <b>18,00</b> |
| 10/2015                                        | average temp. [°C]        | 9,58    | 6,69  | 7,92  | <b>8,07</b>  |
|                                                | average air humidity [%]  | 68,63   | 89,10 | 87,95 | <b>81,89</b> |
|                                                | total precipitations [mm] | 0,10    | 24,80 | 5,50  | <b>30,40</b> |
| 11/2015                                        | average temp. [°C]        | 7,51    | 9,70  | 2,20  | <b>6,47</b>  |
|                                                | average air humidity [%]  | 86,87   | 88,41 | 88,55 | <b>87,94</b> |
|                                                | total precipitations [mm] | 8,20    | 33,80 | 7,50  | <b>49,50</b> |
| 12/2015                                        | average temp. [°C]        | 6,86    | 5,13  | 5,76  | <b>5,92</b>  |
|                                                | average air humidity [%]  | 87,98   | 93,01 | 82,27 | <b>87,75</b> |
|                                                | total precipitations [mm] | 6,60    | 17,30 | 2,40  | <b>26,30</b> |
| 01/2016                                        | average temp. [°C]        | -6,36   | -1,63 | 2,53  | <b>-1,82</b> |
|                                                | average air humidity [%]  | 85,60   | 92,28 | 86,17 | <b>88,25</b> |
|                                                | total precipitations [mm] | 2,90    | 16,70 | 6,30  | <b>25,90</b> |
| 02/2016                                        | average temp. [°C]        | 6,09    | 2,73  | 2,76  | <b>3,86</b>  |
|                                                | average air humidity [%]  | 79,77   | 89,99 | 88,62 | <b>86,13</b> |
|                                                | total precipitations [mm] | 9,70    | 10,00 | 16,60 | <b>36,30</b> |
| 03-2016                                        | average temp. [°C]        | 3,27    | 3,02  | 6,64  | <b>4,31</b>  |
|                                                | average air humidity [%]  | 91,81   | 86,02 | 83,14 | <b>86,99</b> |

|         |                           |       |       |       |               |
|---------|---------------------------|-------|-------|-------|---------------|
|         | total precipitations [mm] | 15,50 | 4,80  | 4,70  | <b>25,00</b>  |
| 04/2016 | average temp. [°C]        | 10,79 | 9,96  | 7,22  | <b>9,33</b>   |
|         | average air humidity [%]  | 67,54 | 79,95 | 67,90 | <b>71,80</b>  |
|         | total precipitations [mm] | 5,0   | 18,6  | 2,1   | <b>25,70</b>  |
| 05-2016 | average temp. [°C]        | 14,39 | 13,42 | 19,93 | <b>15,91</b>  |
|         | average air humidity [%]  | 66,08 | 71,43 | 68,64 | <b>68,66</b>  |
|         | total precipitations [mm] | 0,00  | 18,30 | 9,00  | <b>27,30</b>  |
| 06/2016 | average temp. [°C]        | 18,40 | 17,48 | 21,35 | <b>19,08</b>  |
|         | average air humidity [%]  | 64,22 | 73,18 | 73,00 | <b>70,13</b>  |
|         | total precipitations [mm] | 6,00  | 26,50 | 0,00  | <b>32,50</b>  |
| 07/2016 | average temp. [°C]        | 18,66 | 18,57 | 21,25 | <b>19,49</b>  |
|         | average air humidity [%]  | 69,77 | 80,24 | 75,36 | <b>75,12</b>  |
|         | total precipitations [mm] | 4,30  | 89,90 | 21,80 | <b>115,90</b> |
| 08/2016 | average temp. [°C]        | 18,41 | 17,07 | 19,48 | <b>18,32</b>  |
|         | average air humidity [%]  | 78,63 | 71,45 | 73,41 | <b>74,50</b>  |
|         | total precipitations [mm] | 5,80  | 0,10  | 12,60 | <b>18,50</b>  |

**Table S5.** Meteorological data during the field experiment in the sowing season 2016/2017.

| Location of meteorological station: Winna Góra |                           |         |       |       |              |
|------------------------------------------------|---------------------------|---------|-------|-------|--------------|
| Month/year                                     | Weather parameters        | Decades |       |       | Mean/total   |
|                                                |                           | I       | II    | III   |              |
| 9/2016                                         | average temp. [°C]        | 18,69   | 18,45 | 13,57 | <b>16,90</b> |
|                                                | average air humidity [%]  | 75,70   | 65,15 | 73,10 | <b>71,32</b> |
|                                                | total precipitations [mm] | 11,3    | 0,00  | 3,90  | <b>15,20</b> |
| 10/2016                                        | average temp. [°C]        | 10,22   | 7,16  | 7,55  | <b>8,31</b>  |
|                                                | average air humidity [%]  | 89,35   | 91,90 | 92,03 | <b>91,09</b> |
|                                                | total precipitations [mm] | 0,00    | 21,20 | 15,20 | <b>36,40</b> |
| 11/2016                                        | average temp. [°C]        | 3,68    | 3,16  | 0,62  | <b>2,49</b>  |
|                                                | average air humidity [%]  | 93,28   | 92,09 | 93,61 | <b>92,99</b> |
|                                                | total precipitations [mm] | 10,50   | 7,70  | 2,30  | <b>20,50</b> |
| 12/2016                                        | average temp. [°C]        | 2,90    | 0,94  | 1,76  | <b>1,87</b>  |
|                                                | average air humidity [%]  | 92,64   | 94,47 | 91,51 | <b>92,87</b> |
|                                                | total precipitations [mm] | 14,80   | 17,70 | 7,20  | <b>39,70</b> |
| 01/2017                                        | average temp. [°C]        | -3,45   | -2,33 | -1,19 | <b>-2,32</b> |
|                                                | average air humidity [%]  | 82,49   | 91,87 | 86,93 | <b>87,10</b> |
|                                                | total precipitations [mm] | 4,00    | 6,00  | 0,40  | <b>10,40</b> |
| 02/2017                                        | average temp. [°C]        | -2,82   | -0,42 | 5,90  | <b>0,89</b>  |
|                                                | average air humidity [%]  | 88,50   | 85,25 | 81,25 | <b>85,00</b> |
|                                                | total precipitations [mm] | 0,00    | 6,30  | 16,40 | <b>22,70</b> |
| 03/2017                                        | average temp. [°C]        | 5,91    | 5,47  | 9,09  | <b>6,82</b>  |
|                                                | average air humidity [%]  | 82,27   | 80,56 | 72,34 | <b>78,39</b> |
|                                                | total precipitations [mm] | 12,30   | 15,40 | 10,40 | <b>27,70</b> |

|         |                           |       |       |       |       |
|---------|---------------------------|-------|-------|-------|-------|
| 04/2017 | average temp. [°C]        | 11,10 | 5,99  | 6,80  | 7,96  |
|         | average air humidity [%]  | 78,80 | 77,32 | 75,78 | 77,30 |
|         | total precipitations [mm] | 4,50  | 24,60 | 9,10  | 38,20 |
| 05/2017 | average temp. [°C]        | 8,85  | 16,50 | 17,28 | 14,21 |
|         | average air humidity [%]  | 85,48 | 68,84 | 69,34 | 74,55 |
|         | total precipitations [mm] | 50,90 | 0,00  | 13,40 | 64,30 |
| 06/2017 | average temp. [°C]        | 17,19 | 18,33 | 18,88 | 18,13 |
|         | average air humidity [%]  | 67,81 | 73,96 | 76,73 | 72,83 |
|         | total precipitations [mm] | 22,60 | 6,70  | 21,80 | 51,10 |
| 07/2017 | average temp. [°C]        | 17,22 | 18,39 | 20,09 | 18,57 |
|         | average air humidity [%]  | 78,94 | 75,76 | 80,72 | 78,47 |
|         | total precipitations [mm] | 0,40  | 8,00  | 68,70 | 77,10 |
| 08/2017 | average temp. [°C]        | 22,06 | 19,16 | 17,90 | 19,70 |
|         | average air humidity [%]  | 70,31 | 77,64 | 76,61 | 74,85 |
|         | total precipitations [mm] | 42,10 | 33,00 | 1,70  | 76,80 |

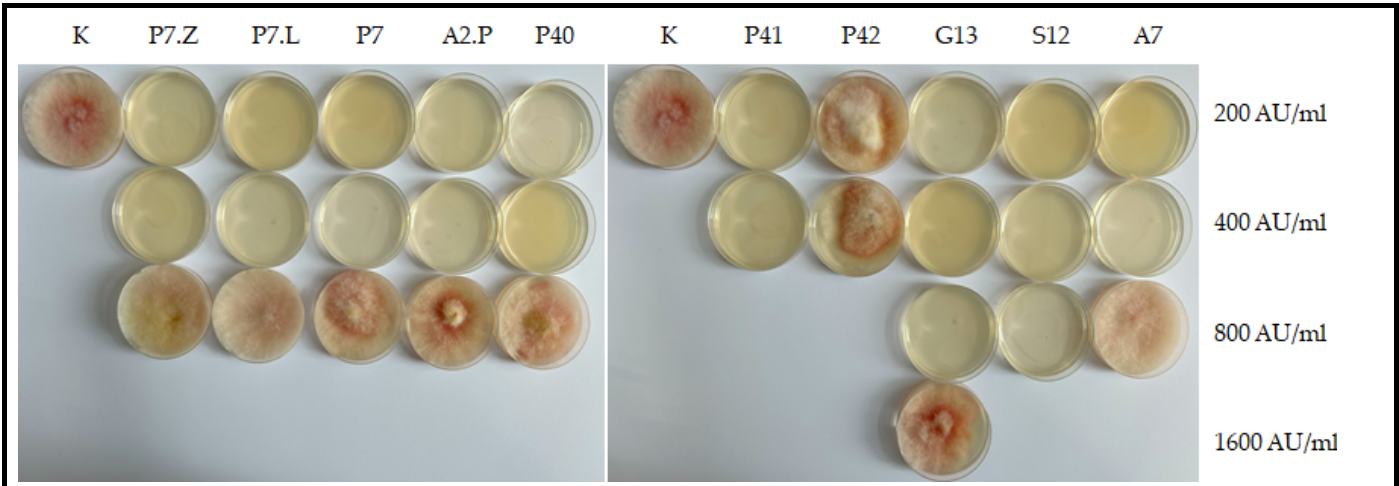

**Figure S1.** Fungistatic activity of tested LAB isolates against *F. graminearum* (C – control; P7.Z, P7.L, P7, A2.P, P40, P41, P42, G13, S12, A7 – LAB isolates).

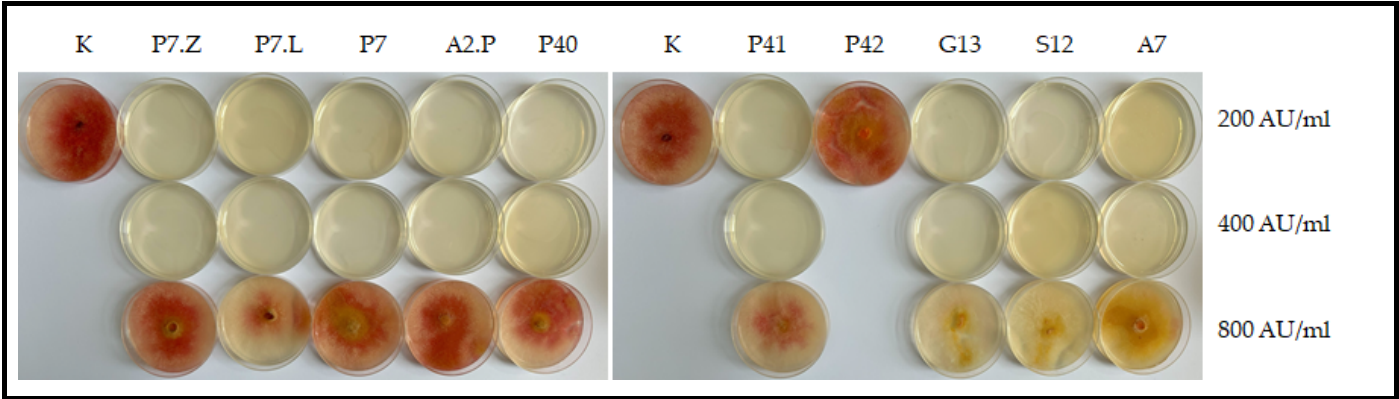

**Figure S2.** Fungistatic activity of tested LAB isolates against *F. culmorum* (C – control; P7.Z, P7.L, P7, A2.P, P40, P41, P42, G13, S12, A7 – LAB isolates).

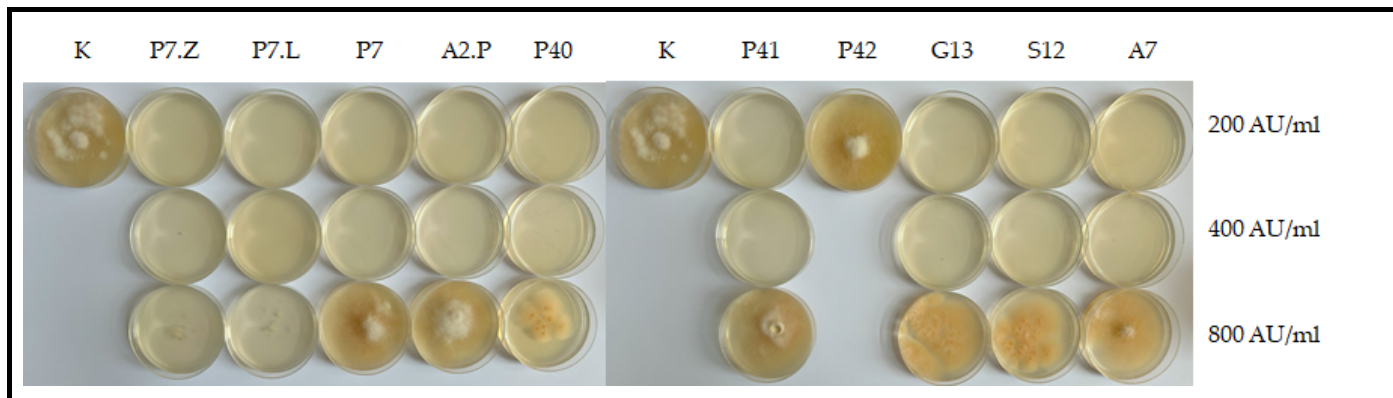

**Figure S3.** Fungistatic activity of tested LAB isolates against *F. poae* (C – control; P7.Z, P7.L, P7, A2.P, P40, P41, P42, G13, S12, A7 – LAB isolates).

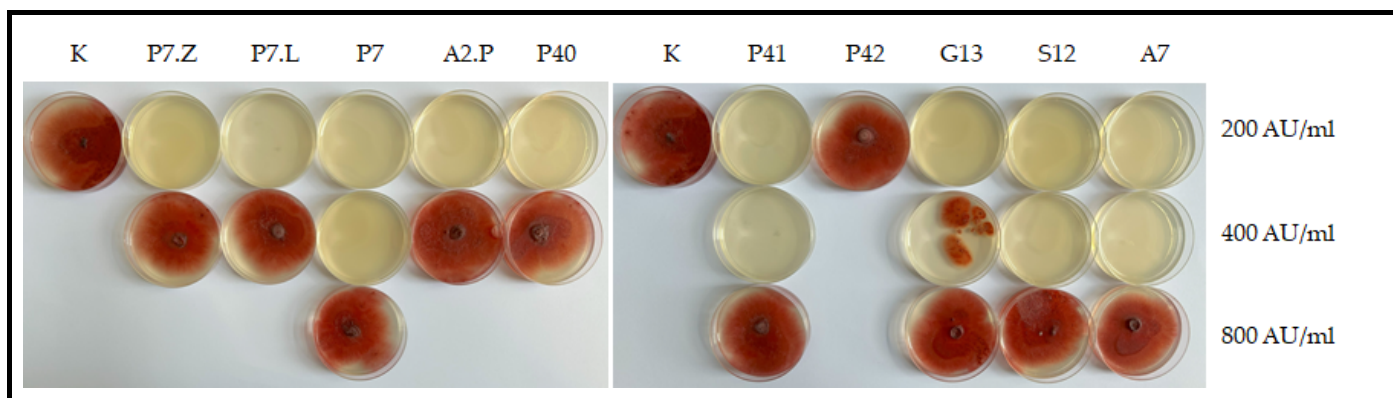

**Figure S4.** Fungistatic activity of tested LAB isolates against *F. oxysporum* (C – control; P7.Z, P7.L, P7, A2.P, P40, P41, P42, G13, S12, A7 – LAB isolates).

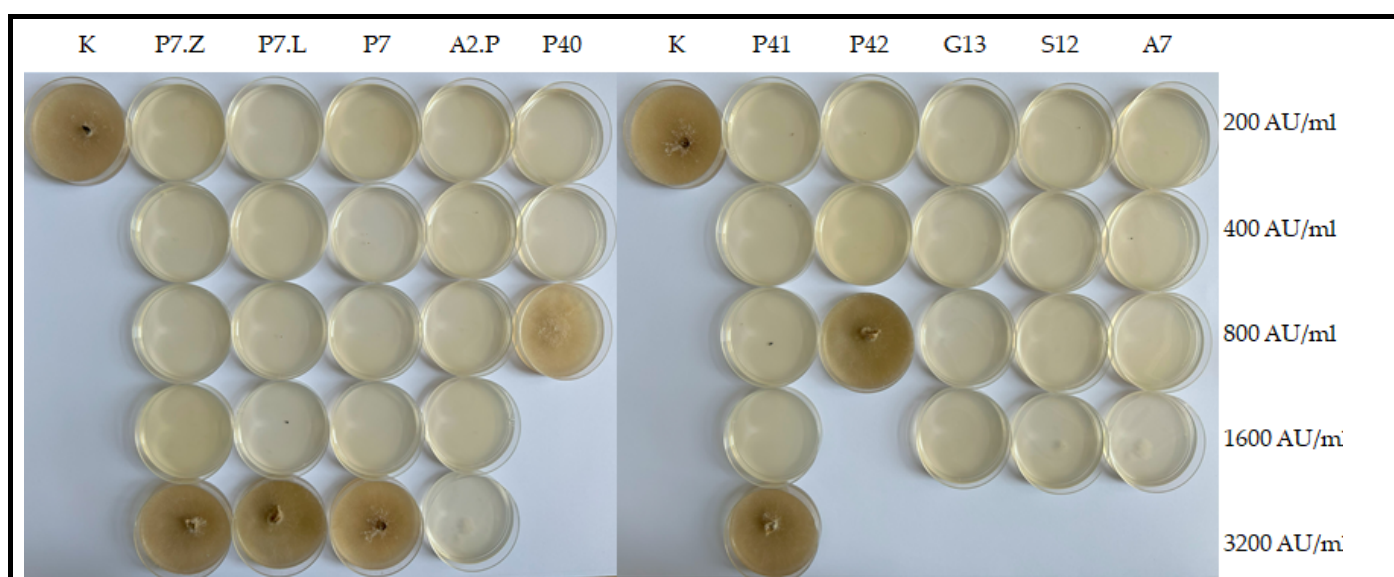

**Figure S5.** Fungistatic activity of tested LAB isolates against *R. solani* (C – control; P7.Z, P7.L, P7, A2.P, P40, P41, P42, G13, S12, A7 – LAB isolates).

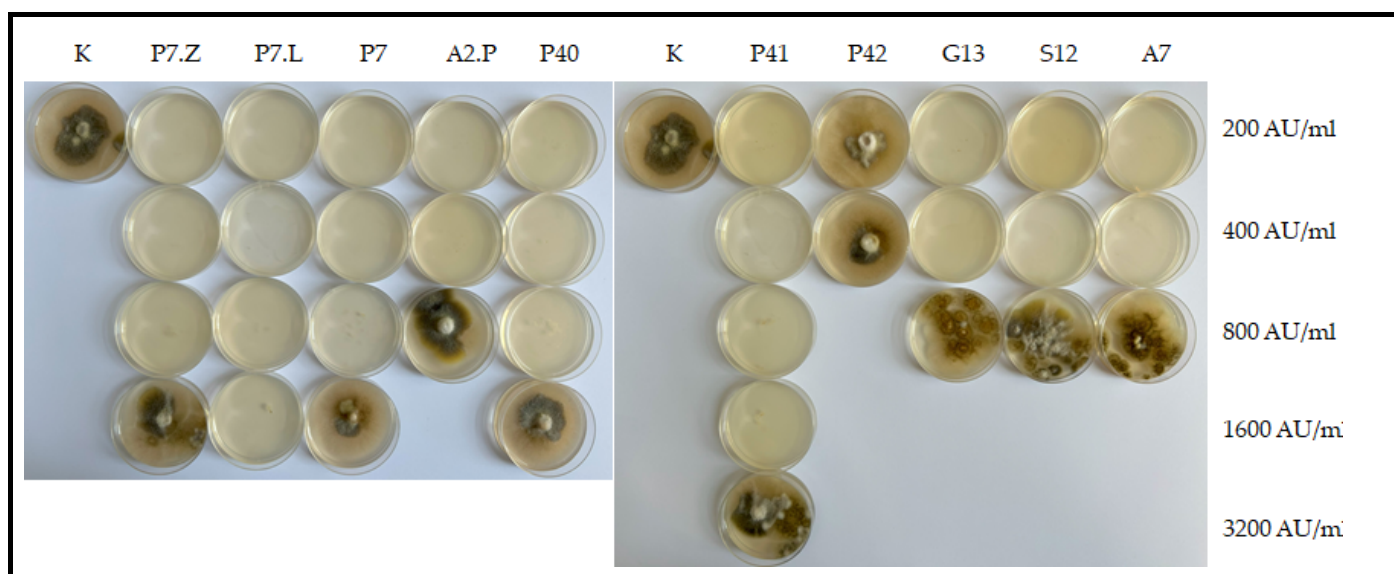



**Figure S6.** Fungistatic activity of tested LAB isolates against *A. alternata* (C – control; P7.Z, P7.L, P7, A2.P, P40, P41, P42, G13, S12, A7 – LAB isolates).

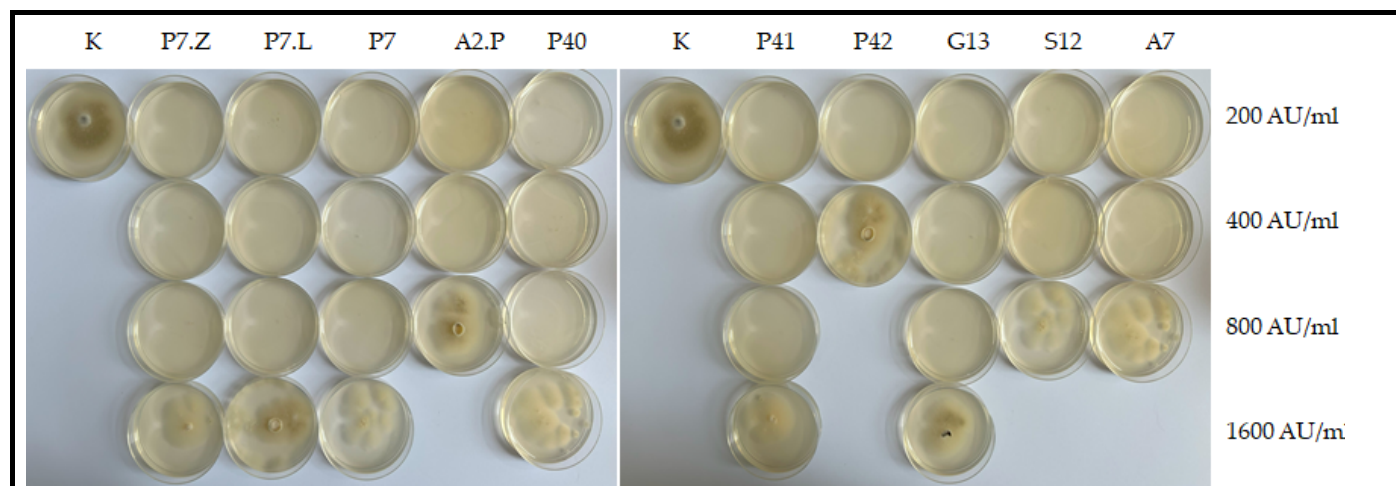

**Figure S7.** Fungistatic activity of tested LAB isolates against *C. gleosporioides* (C – control; P7.Z, P7.L, P7, A2.P, P40, P41, P42, G13, S12, A7 – LAB isolates).

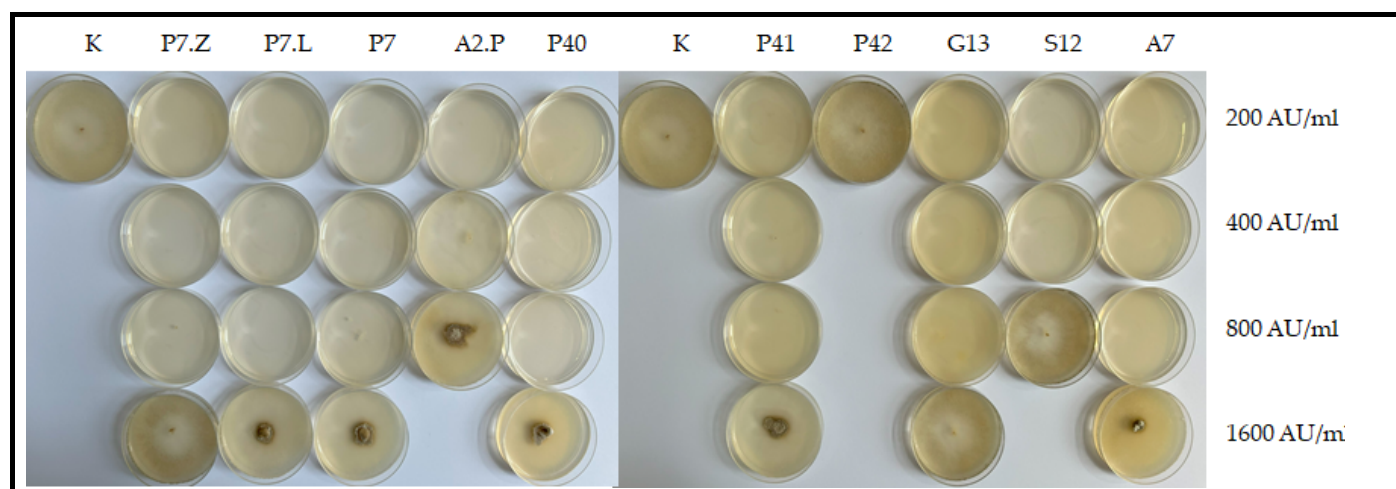

**Figure S8.** Fungistatic activity of tested LAB isolates against *S. sclerotiorum* (C – control; P7.Z, P7.L, P7, A2.P, P40, P41, P42, G13, S12, A7 – LAB isolates).



**Table S6.** Identification of selected strains based on proteomic and genetic profiles.

| Strain no. | MALDI-TOF Identification                    |                            | 16S rRNA gene sequencing                          |                              | Result<br>(GeneBank ID)                              |
|------------|---------------------------------------------|----------------------------|---------------------------------------------------|------------------------------|------------------------------------------------------|
|            | Reference strain<br>(NCBI strain no.)       | LS<br>value <sup>1,2</sup> | Reference strain<br>(GeneBank ID)                 | ID<br>value <sup>3</sup> (%) |                                                      |
| A7         | <i>Lactiplantibacillus plantarum</i> (1255) | 2.13                       | <i>Lactiplantibacillus plantarum</i> (MT538342.1) | 99.93                        | <i>Lactiplantibacillus plantarum</i><br>(OR763289.1) |
| G13        | <i>Lacticaseibacillus paracasei</i> (47714) | 2.34                       | <i>Lacticaseibacillus paracasei</i> (MT613551.1)  | 99.93                        | <i>Lacticaseibacillus paracasei</i><br>(OR757169.1)  |
| S12        | <i>Lacticaseibacillus paracasei</i> (47714) | 2.36                       | <i>Lacticaseibacillus paracasei</i> (OR287076.1)  | 99.78                        | <i>Lacticaseibacillus paracasei</i><br>(OR757260.1)  |
| P7         | <i>Lentilactobacillus buchneri</i> (1581)   | 1.83                       | <i>Lentilactobacillus buchneri</i> (OR029286.1)   | 99.66                        | <i>Lentilactobacillus buchneri</i><br>(OR757276.1)   |
| P41        | <i>Lentilactobacillus buchneri</i> (1581)   | 1.78                       | <i>Lentilactobacillus buchneri</i> (MG646732.1)   | 99.93                        | <i>Lentilactobacillus buchneri</i><br>(OR757298.1)   |

<sup>1</sup>LS value—BioTyper Log score value;<sup>2</sup>The significance of the identification index according to Bruker MALDI Biotyper: range  $\geq 2.00$  high-confidence identification, 1.99–1.70 low-confidence identification;<sup>3</sup>ID value—identification value.**Table S7.** 16S rRNA gene sequences for selected LAB isolates.

| Isolate                                                     | Sequence                                                                                                                                                                                                                                                                                                                                                                                                                                                                                                                                                                                                                                                                                                                                                                                                                                                                                                                                                                                                                                                                                                                                                                                                                                                                                                                                                                                                                                                                                                                                                                                                                                                                                                    |
|-------------------------------------------------------------|-------------------------------------------------------------------------------------------------------------------------------------------------------------------------------------------------------------------------------------------------------------------------------------------------------------------------------------------------------------------------------------------------------------------------------------------------------------------------------------------------------------------------------------------------------------------------------------------------------------------------------------------------------------------------------------------------------------------------------------------------------------------------------------------------------------------------------------------------------------------------------------------------------------------------------------------------------------------------------------------------------------------------------------------------------------------------------------------------------------------------------------------------------------------------------------------------------------------------------------------------------------------------------------------------------------------------------------------------------------------------------------------------------------------------------------------------------------------------------------------------------------------------------------------------------------------------------------------------------------------------------------------------------------------------------------------------------------|
| A7:<br><i>Lactiplantibacillus plantarum</i><br>(OR763289.1) | <p>TGGGCAATGCGGGCTGCTATACATGCAGTCGAACGAACCTCTGGTATTGATTGGTGCTTGCATCATGAT</p> <p>TTACATTGAGTGAGTGGCGAACTGGTGAGTAACACGTGGGAAACCTGCCCAGAAGCGGGGGATAAC</p> <p>ACCTGGAAACAGATGCTAATACCGCATAACAACCTGGACCGCATGGTCCGAGTTTGAAAGATGGCTT</p> <p>CGGCTATCACTTTTGGATGGTCCC CGCGGCTATTAGCTAGATGGTGGGGTAACGGCTCACCATGGCAA</p> <p>TGATACGTAGCCGACCTGAGAGGGTAATCGGCCACATTGGGACTGAGACACGGCCCAAACCTCCTACG</p> <p>GGAGGCAGCAGTAGGGAATCTTCCACAATGGACGAAAGTCTGATGGAGCAACGCCGCGTGAGTGAA</p> <p>GAAGGGTTTCGGCTCGTAAACTCTGTTGTTAAAGAAGAACATATCTGAGAGTAAGTGTTCAGGTATT</p> <p>GACGGTATTTAACCAGAAAGCCACGGCTAACTACGTGCCAGCAGCCGCGGTAATACGTAGGTGGCAA</p> <p>GCGTTGTCCGATTATTGGGCGTAAAGCGAGCGCAGGCGGTTTTTAAGTCTGATGTGAAAGCCCTTC</p> <p>GGCTCAACCGAAGAAGTGCATCGGAAACTGGGAAACTTGAGTGCAGAAGAGGACAGTGGAACTCCA</p> <p>TGTGTAGCGGTGAAATGCGTAGATATATGGAAGAACACCAGTGGCGAAGGCGGCTGTCTGGTCTGTA</p> <p>ACTGACGCTGAGGCTCGAAAGTATGGGTAGCAAACAGGATTAGATACCCTGGTAGTCCATACCGTAA</p> <p>ACGATGAATGCTAAGTGTGGAGGGTTTCCGCCCTTCAGTGCTGCAGCTAACGCATTAAGCATTCCGC</p> <p>CTGGGGAGTACGGCCGCAAGGCTGAAACTCAAAGGAATTGACGGGGGGCCGCACAAGCGGTGGAGC</p> <p>ATGTGGTTTAATTGCAAGCTACGCGAAGAACCTTACCAGGTCTTGACATACTATGCAAATCTAAGAGA</p> <p>TTAGACGTTCCCTTCGGGGACATGGATACAGGTGGTGCATGGTTGTGCTGAGCTCGTGTCTGAGATG</p> <p>TTGGGTAAAGTCCCGCAACGAGCGCAACCTTATTATCAGTTGCCAGCATTAAAGTTGGGCACTCTGGT</p> <p>GAGACTGCCGGTGACAAACCGGAGGAAGGTGGGGATGACGTCAAATCATCATGCCCTTATGACCTG</p> <p>GGCTACACACGTGCTACAATGGATGGTACAACGAGTTGCGAACTCGCGAGAGTAAGCTAATCTCTTA</p> <p>AAGCCATTCTCAGTTCGGATTGTAGGCTGCAACTCGCCTACATGAAGTCGGAATCGCTAGTAATCGCG</p> <p>GATCAGCATGCCGCGGTGAATACGTTCCCGGGCCTTGACACACCGCCGCTCACACCATGAGAGTTTG</p> <p>TAACACCCAAAGTCGGTGGGGTAACCTTTAGGAACCAGCCGCTAAGGTGACAGATGCTG</p> |

|                                                                      |                                                                                                                                                                                                                                                                                                                                                                                                                                                                                                                                                                                                                                                                                                                                                                                                                                                                                                                                                                                                                                                                                                                                                                                                                                                                                                                                                                                                                                                                                                                                                                                                                |
|----------------------------------------------------------------------|----------------------------------------------------------------------------------------------------------------------------------------------------------------------------------------------------------------------------------------------------------------------------------------------------------------------------------------------------------------------------------------------------------------------------------------------------------------------------------------------------------------------------------------------------------------------------------------------------------------------------------------------------------------------------------------------------------------------------------------------------------------------------------------------------------------------------------------------------------------------------------------------------------------------------------------------------------------------------------------------------------------------------------------------------------------------------------------------------------------------------------------------------------------------------------------------------------------------------------------------------------------------------------------------------------------------------------------------------------------------------------------------------------------------------------------------------------------------------------------------------------------------------------------------------------------------------------------------------------------|
| <p>G13:<br/><i>Lactocaseibacillus paracasei</i><br/>(OR757169.1)</p> | <p>ATACATGCAGTCGAACGAGTTCTCGTTGATGATCGGTGCTTGACCGAGATTCAACATGGAACGAGTG<br/>GCGGACGGGTGAGTAACACGTGGGTAACCTGCCCTTAAGTGGGGGATAACATTTGGAACAGATGCT<br/>AATACCGCATAGATCCAAGAACCGCATGGTTCTTGGCTGAAAGATGGCGTAAGCTATCGCTTTTGGAT<br/>GGACCCGCGGCGTATTAGCTAGTTGGTGAGGTAATGGCTCACCAAGGCGATGATACGTAGCCGAAC<br/>GAGAGGTTGATCGGCCACATTGGGACTGAGACACGGCCCAAACCTCCTACGGGAGGCAGCAGTAGGG<br/>AATCTTCCACAATGGACGCAAGTCTGATGGAGCAACGCCGCGTGAGTGAAGAAGGCTTTCGGGTCTG<br/>AAAACCTCTGTTGTTGGAGAAGAATGGTCGGCAGAGTAACCTGTTGTCGGCGTGACGGTATCCAACCAG<br/>AAAGCCACGGCTAACTACGTGCCAGCAGCCGCGGTAATACGTAGGTGGCAAGCGTTATCCGGATT<br/>TTGGGCGTAAAGCGAGCGCAGGCGGTTTTTTTAAAGTCTGATGTGAAAGCCCTCGGCTTAACCGAGGAA<br/>GCGCATCGGAAACTGGGAACTTGAGTGCAGAAGAGGACAGTGGAACCTCATGTGTAGCGGTGAAA<br/>TGCGTAGATATATGGAAGAACCAGTGGCGAAGGCGGCTGTCTGGTCTGTAACCTGACGCTGAGGCT<br/>CGAAAGCATGGGTAGCGAACAGGATTAGATACCCTGGTAGTCCATGCCGTAAACGATGAATGCTAGG<br/>TGTTGGAGGGTTTCCGCCCTTCAGTGCCGCAGCTAACGCATTAAGCATTCCGCCTGGGGAGTACGACC<br/>GCAAGGTTGAAACTCAAAGGAATTGACGGGGGCCGCACAAGCGGTGGAGCATGTGGTTTAATTCGA<br/>AGCAACGCGAAGAACCTTACCAGGTCTTGACATCTTTTGATCACCTGAGAGATCAGGTTTCCCCTTCG<br/>GGGGCAAAATGACAGGTGGTGCATGGTTGTCGTCAGCTCGTGTCTGAGATGTTGGGTAAAGTCCCGC<br/>AACGAGCGCAACCCCTTATGACTAGTTGCCAGCATTTAGTTGGGCACTCTAGTAAGACTGCCGGTGACA<br/>AACCGGAGGAAGGTGGGGATGACGTCAAATCATCATGCCCCCTTATGACCTGGGCTACACACGTGCTA<br/>CAATGGATGGTACAACGAGTTGCGAGACCGCGAGGTCAAGCTAATCTCTTAAAGCCATTCTCAGTTTCG<br/>GACTGTAGGCTGCAACTCGCTACACGAAGTCGGAATCGCTAGTAATCGCGGATCAGCACGCCGCGG<br/>TGAATACGTTCCCGGGCCTTGACACACCGCCCGTCACACCATGAGAGTTTGTAAACCCGAAGCCG<br/>GTGGCGTAACCCCTTTAGGGAGCGAGCCGT</p> |
| <p>S12:<br/><i>Lactocaseibacillus paracasei</i><br/>(OR757260.1)</p> | <p>GAGTGGCGGACGGGTGAGTAACACGTGGGTAACCTGCCCTTAAGTGGGGGATAACATTTGGAACAG<br/>ATGCTAATACCGCATAGATCCAAGAACCGCATGGTTCTTGGCTGAAAGATGGCGTAAGCTATCGCTTT<br/>TGGATGGACCCGCGGCGTATTAGCTAGTTGGTGAGGTAATGGCTCACCAAGGCGATGATACGTAGCC<br/>GAACTGAGAGGTTGATCGGCCACATTGGGACTGAGACACGGCCCAAACCTCCTACGGGAGGCAGCAG<br/>TAGGGAATCTTCCACAATGGACGCAAGTCTGATGGAGCAACGCCGCGTGAGTGAAGAAGGCTTTCGG<br/>GTCGTAAACTCTGTTGTTGGAGAAGAATGGTCGGCAGAGTAACCTGTTGTCGGCGTGACGGTATCCAA<br/>CCAGAAAGCCACGGCTAACTACGTGCCAGCAGCCGCGGTAATACGTAGGTGGCAAGCGTTATCCGGA<br/>TTTATTGGGCGTAAAGCGAGCGCAGGCGGTTTTTTAAAGTCTGATGTGAAAGCCCTCGGCTTAACCGAG<br/>GAAGCGCATCGGAAACTGGGAACTTGAGTGCAGAAGAGGACAGTGGAACCTCATGTGTAGCGGTG<br/>AAATGCGTAGATATATGGAAGAACCAGTGGCGAAGGCGGCTGTCTGGTCTGTAACCTGACGCTGAG<br/>GCTCGAAAGCATGGGTAGCGAACAGGATTAGATACCCTGGTAGTCCATGCCGTAAACGATGAATGCT<br/>AGGTGTTGGAGGGTTTCCGCCCTTCAGTGCCGCAGCTAACGCATTAAGCATTCCGCCTGGGGAGTACG<br/>ACCGCAAGGTTGAAACTCAAAGGAATTGACGGGGGCCGCACAAGCGGTGGAGCATGTGGTTTAATT<br/>CGAAGCAACGCGAAGAACCTTACCAGGTCTTGACATCTTTTGATCACCTGAGAGATCAGGTTTCCCCT<br/>TCGGGGGCAAAATGACAGGTGGTGCATGGTTGTCGTCAGCTCGTGTCTGAGATGTTGGGTAAAGTCC<br/>CGCAACGAGCGCAACCCCTTATGACTAGTTGCCAGCATTTAGTTGGGCACTCTAGTAAGACTGCCGGTG<br/>ACAAACCGGAGGAAGGTGGGGATGACGTCAAATCATCATGCCCCCTTATGACCTGGGCTACACACGTG<br/>CTACAATGGATGGTACAACGAGTTGCGAGACCGCGAGGTCAAGCTAATCTCATAAATCCATTCTCAG<br/>TTGGGACTGTAGGCTGCAACTCGCTACACGAAGTCGGAATCGCTAGTAATCGCGGATCAGCACGCC<br/>GCGGTGAATACGTTCCCGGGCCTTGACACACCGCCCGTCACACCATGAGAGTTTGTAAACCC</p>                                                                                                               |

|                                                                     |                                                                                                                                                                                                                                                                                                                                                                                                                                                                                                                                                                                                                                                                                                                                                                                                                                                                                                                                                                                                                                                                                                                                                                                                                                                                                                                                                                                                                                                                                                                                                                               |
|---------------------------------------------------------------------|-------------------------------------------------------------------------------------------------------------------------------------------------------------------------------------------------------------------------------------------------------------------------------------------------------------------------------------------------------------------------------------------------------------------------------------------------------------------------------------------------------------------------------------------------------------------------------------------------------------------------------------------------------------------------------------------------------------------------------------------------------------------------------------------------------------------------------------------------------------------------------------------------------------------------------------------------------------------------------------------------------------------------------------------------------------------------------------------------------------------------------------------------------------------------------------------------------------------------------------------------------------------------------------------------------------------------------------------------------------------------------------------------------------------------------------------------------------------------------------------------------------------------------------------------------------------------------|
| <p>P7:<br/><i>Lentilactobacillus buchneri</i><br/>(OR757276.1)</p>  | <p>CGTCTCCGTTGATGATTTTAGGTGCTTGCACTTGAAAGATTAAACATTGAGACGAGTGCGGAACCTGGT<br/>GAGTAACACGTGGGTAACCTGCCCTGAAGTAGGGGATAACACTTGAAACAGGTGCTAATACCGTA<br/>TAACAACCAAAACCACCTGGTTTTGGTTTAAAAGACGGCTTCGGCTGCACTTTAGGATGGACCCGCG<br/>GCGTATTAGCTTGTGGTAAGGTAACGGCCTACCAAGGCGATGATACGTAGCCGACCTGAGAGGGTA<br/>ATCGGCCACATTGGGACTGAGACACGGCCCAAACCTCCTACGGGAGGCAGCAGTAGGGAATCTTCCAC<br/>AATGGACGAAAAGTCTGATGGAGCAACGCCGCGTGAGTGATGAAGGGTTTCGGCTCGTAAAACCTCTGT<br/>TGTGGAGAAGAACAGGTGTCAGAGTAAGTGTGACATCTTGACGGTATCCAACCAGAAAGCCACGG<br/>CTAACTACGTGCCAGCAGCCGCGTAATACGTAGGTGGCAAGCGTTGTCCGGATTATTGGGCGTAA<br/>AGCGAGCGCAGGCGGTTTTTAGGTCTGATGTGAAAGCCTTCGGCTTAACCGGAGAAGTGCATCGGA<br/>AACCGGGAGACTTGAGTGCAGAAGAGGACAGTGGAACCTCATGTGTAGCGGTGAAATGCGTAGATA<br/>TATGGAAGAACACCAGTGGCGAAGGCGGCTGTCTGGTCTGTAAGTACGCTGAGGCTCGAAAGCATG<br/>GGTAGCGAACAGGATTAGATACCCTGGTAGTCCATGCCGTAAACGATGAGTGCTAAGTGTGGAGGG<br/>TTTCCGCCCTTCAGTGCTGCAGCTAACGCATTAAGCACTCCGCCTGGGGAGTACGACCGCAAGGTTGA<br/>AACTCAAAGGAATTGACGGGGGCCGCACAAGCGGTGGAGCATGTGGTTTAATTCGATGCTACGCGA<br/>AGAACCTTACCAGGTCTTGACATCTTCTGCCAACCTAAGAGATTAGGCGTTCCTTCGGGGACAGAAT<br/>GACAGGTGGTGCATGGTTGTCGTCAGCTCGTGTCTGAGATGTTGGGTAAAGTCCCGCAACGAGCGCA<br/>ACCTTATTGTTAGTTGCCAGCATTCAGTTGGGCACTCTAGCAAGACTGCCGGTGACAAACCGGAGGA<br/>AGGTGGGGATGACGTCAAATCATCATGCCCCTTATGACCTGGGCTACACACGTGCTACAATGGACGG<br/>TACAACGAGTCGCGAAACCGCGAGGTCAAGCTAATCTCTTAAAGCCGTTCTCAGTTCCGATTGTAGGC<br/>TGCAACTCGCCTACATGAAGTTGGAATCGCTAGTAATCGTGGATCAGCATGCCACGGTGAATACGTTT<br/>CCGGGCCCTTGACACACCGCCCGTCACACCATGAGAGTTTGTAAACCCCAAAGCCGGTGAGGTAGCC<br/>TT</p> |
| <p>P41:<br/><i>Lentilactobacillus buchneri</i><br/>(OR757298.1)</p> | <p>TGCAGTCGCCCCGCTCTCCGTTAATGATTTTAGGTGCTTGCACTTGAAAGATTAAACATTGAGACGAGT<br/>GGCGAACTGGTGAGTAACACGTGGGTAACCTGCCCTGAAGTAGGGGATAACACTTGAAACAGGTG<br/>CTAATACCGTATAACAACCAAAACCACCTGGTTTTGGTTTAAAAGACGGCTTCGGCTGCACTTTAGG<br/>ATGGACCCGCGGCGTATTAGCTTGTGGTAAGGTAACGGCTTACCAAGGCGATGATACGTAGCCGAC<br/>CTGAGAGGGTAATCGGCCACATTGGGACTGAGACACGGCCCAAACCTCCTACGGGAGGCAGCAGTAG<br/>GGAATCTTCCACAATGGACGAAAGTCTGATGGAGCAACGCCGCGTGAGTGATGAAGGGTTTCGGCTC<br/>GTAAAACCTCTGTTGTTGGAGAAGAACAGGTGTCAGAGTAAGTGTGACATCTTGACGGTATCCAACCA<br/>GAAAGCCACGGCTAACTACGTGCCAGCAGCCGCGTAATACGTAGGTGGCAAGCGTTGTCCGGATT<br/>ATTGGGCGTAAAGCGAGCGCAGGCGGTTTTTAGGTCTGATGTGAAAGCCTTCGGCTTAACCGGAGA<br/>AGTGCATCGGAAACCGGGAGACTTGAGTGCAGAAGAGGACAGTGGAACCTCATGTGTAGCGGTGAA<br/>ATGCGTAGATATATGGAAGAACACCAGTGGCGAAGGCGGCTGTCTGGTCTGTAAGTACGCTGAGGC<br/>TCGAAAGCATGGGTAGCGAACAGGATTAGATACCCTGGTAGTCCATGCCGTAAACGATGAGTGCTAA<br/>GTGTTGGAGGGTTTCCGCCCTTCAGTGCTGCAGCTAACGCATTAAGCACTCCGCCTGGGGAGTACGAC<br/>CGCAAGGTTGAAACTCAAAGGAATTGACGGGGGGCCGCACAAGCGGTGGAGCATGTGGTTTAATTCG<br/>ATGCTACGCGAAGAACCTTACCAGGTCTTGACATCTTCTGCCAACCTAAGAGATTAGGCGTTCCTTC<br/>GGGGACAGAATGACAGGTGGTGCATGGTTGTCGTCAGCTCGTGTCTGAGATGTTGGGTAAAGTCCCG<br/>CAACGAGCGCAACCTTATTGTTAGTTGCCAGCATTCAGTTGGGCACTCTAGCAAGACTGCCGGTGAC<br/>AAACCGGAGGAAGGTGGGGATGACGTCAAATCATCATGCCCCTTATGACCTGGGCTACACACGTGCT<br/>ACAATGGACGGTACAACGAGTCGCGAAACCGCGAGGTCAAGCTAATCTCTTAAAGCCGTTCTCAGTT<br/>CGGATTGTAGGCTGCAACTCGCCTACATGAAGTTGGAATCGCTAGTAATCGTGGATCAGCATGCCACG</p>                                                                               |

|                                                                                               |
|-----------------------------------------------------------------------------------------------|
| GTGAATACGTTCCCGGGCCTTGTACACACCGCCCGTCACACCATGAGAGTTTGTAAACACCCAAAGCC<br>GGTGAGGTAACCTTCGGGACC |
|-----------------------------------------------------------------------------------------------|

**Table S8.** The effect of LAB treatment on phytotoxicity (%).

| Treatment                           | 2015/2016             |     |                       |     |                       |     | 2016/2017             |     |                       |     |                       |     |
|-------------------------------------|-----------------------|-----|-----------------------|-----|-----------------------|-----|-----------------------|-----|-----------------------|-----|-----------------------|-----|
|                                     | 12.11.2015<br>BBCH 12 |     | 20.11.2015<br>BBCH 12 |     | 17.03.2016<br>BBCH 23 |     | 18.11.2016<br>BBCH 11 |     | 12.12.2016<br>BBCH 12 |     | 31.03.2017<br>BBCH 23 |     |
|                                     | wheat                 | rye |
| <i>L. plantarum</i> A7              | 0                     | 0   | 0                     | 0   | 0                     | 0   | 0                     | 0   | 0                     | 0   | 0                     | 0   |
| <i>L. paracasei</i> G13             | 0                     | 0   | 0                     | 0   | 0                     | 0   | 0                     | 0   | 0                     | 0   | 0                     | 0   |
| <i>L. paracasei</i> S12             | 0                     | 0   | 0                     | 0   | 0                     | 0   | 0                     | 0   | 0                     | 0   | 0                     | 0   |
| <i>L. buchneri</i> P7               | 0                     | 0   | 0                     | 0   | 0                     | 0   | 0                     | 0   | 0                     | 0   | 0                     | 0   |
| <i>L. buchneri</i> P41              | 0                     | 0   | 0                     | 0   | 0                     | 0   | 0                     | 0   | 0                     | 0   | 0                     | 0   |
| Vibrance Gold 100 FS/Vitavax 200 FS | 0                     | 0   | 0                     | 0   | 0                     | 0   | 0                     | 0   | 0                     | 0   | 0                     | 0   |

0 – no phytotoxic effect has been stated
